# Supplementary material for: Comparative cost of illness analysis and assessment of health care burden of Duchenne and Becker muscular dystrophies in Germany
Source: Springer Nature journal article supplement (doi:10.1186/s13023-014-0210-9), 2014-12-01
Supplement: MOESM1 [file 9776000]

## Additional file:

### Formula for calculation of indirect costs caused by patients:

$$\text{Loss of productivity (2013)} = LP_{\text{disability}} + LP_{\text{invalidity}}$$

Loss of productivity due to disability:  $LP_{\text{disability}} = (Abs_{LT} + Abs_{ST} + Rehab) \times S_d + S_{lost} \times t$

$Abs_{LT}$ : long-term absenteeism due to BMD/DMD in one year (in days)

$Abs_{ST}$ : short-term absenteeism - absent hours due to BMD/DMD in one year and conversion into days

Rehab: days in rehabilitation in one year

$S_d$ : actual gross salary per day

$S_{lost}$ : loss of gross salary per month caused by changes in working hours

t: number of months with reduced salary due to changes in working hours in 2013

Loss of productivity due to invalidity:  $LP_{\text{inval}} = D_{lost} \times S_{di}$

$D_{lost}$ : lost working days due to DMD/BMD in one year

$S_{di}$ : previous gross salary per day, inflation adjusted

Patients who never worked: average gross salary per month for men in Germany in 2013 [1] extrapolated to one year

### Formula for calculation of indirect costs caused by parents:

$$\text{Loss of productivity (2013)} = LP_{\text{absenteeism}} + LP_{\text{changes}}$$

Loss of productivity due to absenteeism:  $LP_{\text{absenteeism}} = (Abs_{LT} + Abs_{ST} + Rehab) \times S_d$

$Abs_{LT}$ : long-term absenteeism due to child's BMD/DMD in one year (in days)

$Abs_{ST}$ : short-term absenteeism - absent hours due to child's BMD/DMD in one year and conversion into days

Rehab: days in rehabilitation in one year

$S_d$ : actual gross salary per day

Loss of productivity due to changes in work situation:  $LP_{\text{change}} = S_{lost} \times t + D_{lost} \times S_{di}$

$S_{lost}$ : loss of gross salary per month caused by changes in working hours due to child's disease

t: number of months with reduced salary due to changes in working hours in 2013

$D_{lost}$ : lost working days due to child's DMD/BMD in 2013

$S_{di}$ : previous gross salary per day, inflation adjusted

## References:

1. **Statistisches Bundesamt. Verdienste und Arbeitskosten. Arbeitnehmerverdienste.** vol. Fachserie 16, Reihe 2.3. Wiesbaden; 2014.
